# Supplementary material for: Effects of dietary oregano essential oil and vitamin E supplementation on meat quality, stress response and intestinal morphology in pigs following transport stress
Source: PubMed Central journal article supplement — J Vet Med Sci. 2016 Dec 2;79(2):328–35. doi: 10.1292/jvms.16-0576 (PMC5326938; doi:10.1292/jvms.16-0576), 2016-12-02
Supplement: jvms-79-328-s001.pdf [file jvms-79-328-s001.pdf]

Supplementary Table 1. ANALYSIS OF OREGANO OIL GC-MS

| <b>Component</b>                    | <b>Oregano oil (MGZ-008)</b> |
|-------------------------------------|------------------------------|
|                                     | %                            |
| $\alpha$ -Thujene/ $\alpha$ -Pinene | 0.56                         |
| Camphene                            | 0.08                         |
| $\beta$ -Pinene                     | 0.09                         |
| Sabinene                            | 0.03                         |
| Myrcene                             | 0.91                         |
| $\alpha$ -Phellandrene              | 0.09                         |
| A-Terpinene                         | 0.50                         |
| Limonene                            | 0.15                         |
| 1,8-Cincole+ $\beta$ -phellandrene  | 0.07                         |
| $\beta$ -Ocimene                    | 0.07                         |
| r-Terpinene                         | 4.54                         |
| 3-Ocimene                           | 0.07                         |
| P-Cymene                            | 3.11                         |
| Terpinoiene                         | 0.05                         |
| 3-Octanoi                           | 0.11                         |
| 1-Octen-3-ol                        | 0.22                         |
| Dimethyl styrene                    | 0.10                         |
| Trans-Sabinene hydrate              | 0.14                         |
| Linalool                            | 0.32                         |
| cis-Sabinene hydrate                | 0.03                         |
| 1-Terpincol                         | 0.05                         |
| Terpinen-4-ol                       | 0.22                         |
| Carvacrol methyl ether              | 0.33                         |
| B-Caryophyllene                     | 1.43                         |
| Dihydrocarvone                      | 0.09                         |
| $\alpha$ -Humulene                  | 0.08                         |
| $\alpha$ -Terpineol                 | 0.21                         |
| Borneol                             | 0.33                         |
| $\beta$ -Bisabolene                 | 0.71                         |
| Caryophyllene oxide                 | 0.16                         |
| Thymol                              | 1.90                         |
| Carvacrol                           | 79.92                        |

*These results relate only to the sample(s) tested and do not guarantee the bulk of the mentioned to the equal quality.*

Supplementary Figure. 1. Typical chromatogram of oregano essential oil components.

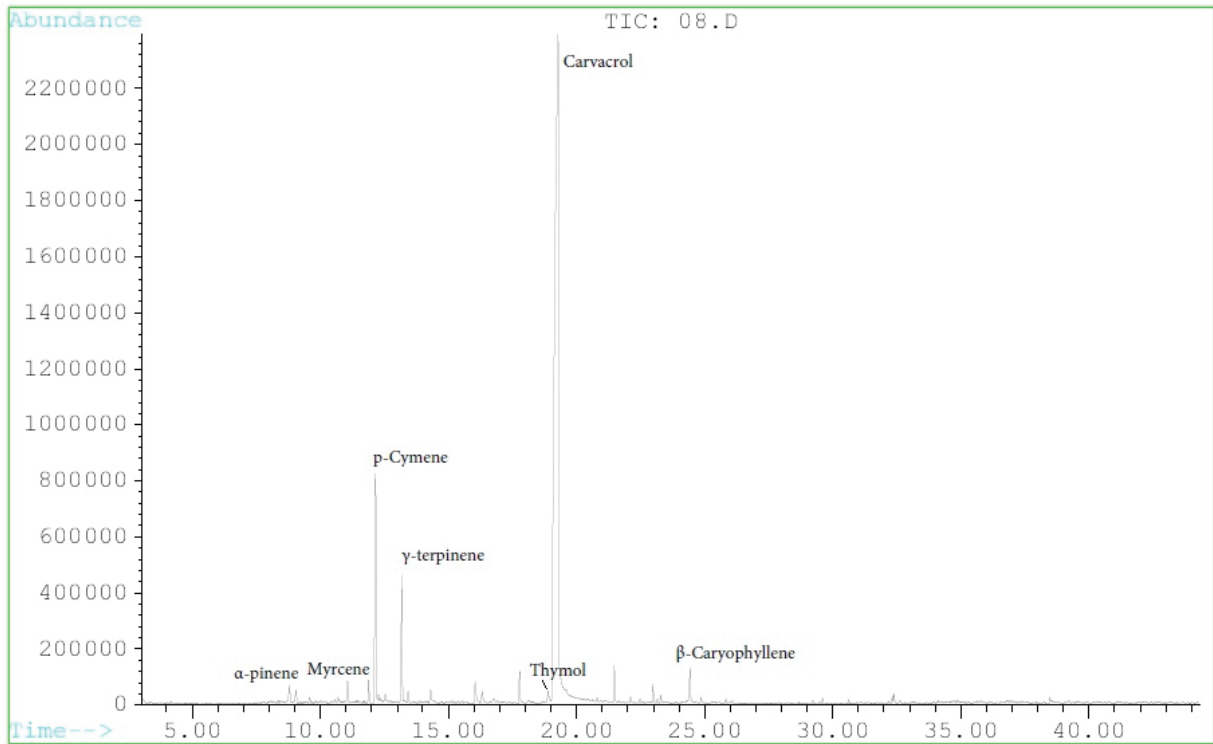

The Figure were provided by Meritech Bioengineering Co. Ltd.
